# Supplementary material
Source: PubMed Central journal article supplement (PMC5152589)
Supplement: NIHMS832097-supplement-supp.pdf [file NIHMS832097-supplement-supp.pdf]

### Figure S1. Infused and removed phosphate during CVVH.

The white bars depict the mean amount of phosphate infused in each patient during the course of the study, while the patterned bars depict the mean phosphate measured in the effluent. Asterisks identify those patients with only one day of CVVH. In those patients, the bars represent a single day’s phosphate infusion and removal on CVVH. In the others, the bars represent the mean over the duration of CVVH collection.

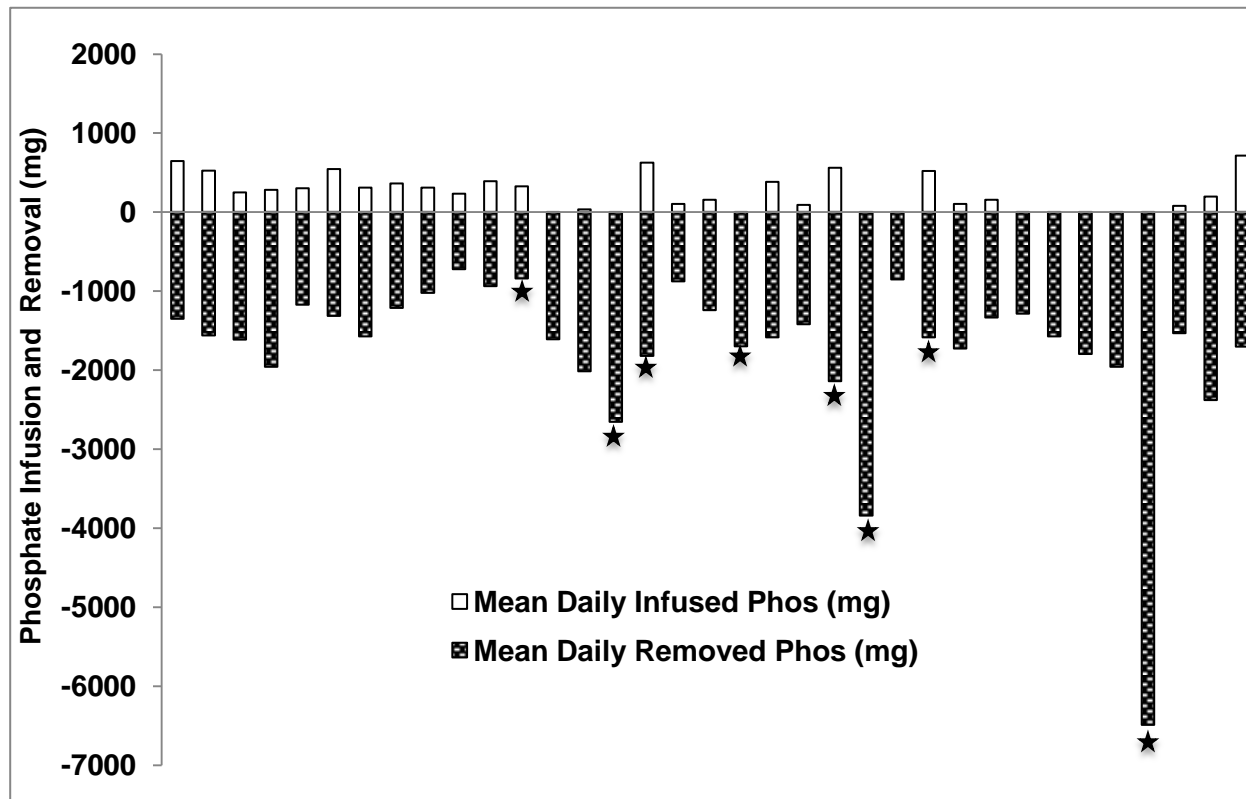

**Table S1.** Demographics and clinical characteristics at CVVH initiation.

| Age/Sex/Race | Reason for ICU admission | Cause of AKI | Nutrition | Day of CVVH initiation after ICU admission | Outcome at end of hospital stay |
|--------------|--------------------------|--------------|-----------|--------------------------------------------|---------------------------------|
| 57/F/H       | Septic Shock             | ATN          | E         | 2                                          | D                               |
| 66/M/C       | Septic Shock             | ATN          | E         | 14                                         | HD                              |
| 48/F/C       | Septic Shock             | M            | P         | 2                                          | D                               |
| 70/M/C       | Surgery                  | ATN          | P         | 2                                          | HD                              |
| 61/F/AA      | Respiratory Failure      | M            | E         | 8                                          | D                               |
| 71/F/C       | Surgery                  | M            | P         | 0                                          | D                               |
| 44/M/C       | Other                    | O            | E         | 10                                         | HD                              |
| 59/M/C       | Septic Shock             | O            | E         | 9                                          | D                               |
| 45/M/C       | Surgery                  | ATN          | P         | 10                                         | D                               |
| 65/F/C       | Surgery                  | M            | None      | 11                                         | HD                              |
| 53/M/C       | Septic Shock             | M            | P         | 20                                         | D                               |
| 73/F/C       | Surgery                  | M            | E         | 5                                          | D                               |
| 25/M/C       | Respiratory Failure      | ATN          | None      | 12                                         | HD                              |
| 63/M/C       | Other                    | ATN          | E         | 1                                          | D                               |
| 47/M/AA      | Other                    | O            | None      | 0                                          | D                               |
| 62/M/C       | Surgery                  | ATN          | E         | 7                                          | HD                              |
| 73/F/C       | Surgery                  | ATN          | None      | 1                                          | R                               |
| 74/M/C       | Surgery                  | ATN          | P         | 1                                          | HD                              |
| 68/M/C       | Septic Shock             | ATN          | None      | 2                                          | D                               |
| 41/M/C       | Surgery                  | M            | None      | 1                                          | D                               |
| 71/M/C       | Septic Shock             | ATN          | None      | 1                                          | D                               |
| 51/F/C       | Septic Shock             | M            | E         | 4                                          | R                               |
| 64/M/C       | Other                    | ATN          | P         | 1                                          | D                               |
| 62/M/C       | Septic Shock             | M            | P         | 3                                          | D                               |
| 78/M/AA      | Respiratory Failure      | ATN          | E         | 14                                         | D                               |
| 64/F/AA      | Respiratory Failure      | ATN          | None      | 12                                         | D                               |
| 60/M/C       | Other                    | ATN          | E         | 1                                          | D                               |
| 80/M/C       | Surgery                  | ATN          | P         | 4                                          | D                               |
| 57/M/C       | Other                    | M            | None      | 3                                          | D                               |
| 72/M/C       | Surgery                  | ATN          | None      | 15                                         | D                               |
| 48/F/C       | Respiratory Failure      | M            | P         | 14                                         | D                               |
| 52/M/C       | Septic Shock             | ATN          | None      | 4                                          | D                               |
| 54/M/H       | Septic Shock             | ATN          | P         | 7                                          | D                               |
| 50/M/C       | Septic Shock             | M            | E         | 2                                          | D                               |
| 66/M/C       | Other                    | ATN          | E         | 33                                         | HD                              |

Legend: AA, African American; C, Caucasian; H, Hispanic; P, Parenteral Nutrition; E, Enteral Nutrition; N, None; D, Death; HD, Hemodialysis; R, Renal Recovery; ATN, acute tubular necrosis; M, Multifactorial; O, other (AKI secondary to acute interstitial nephritis, atheroembolic disease, or contrast induced nephropathy)

**Table S2.** Serial Effluent Collections in patients on CVVH.

| Age/Sex/Wt (Kg) | Duration of collection, (days) | Pre-CVVH Phos, (mg/dl) | Post-CVVH Phos, (mg/dl) | Net I/v Phos intake A, (mg) | Net Nutritional Phos intake B, (mg) | Net Phos intake A+B (mg) | Net Phosphate removed, (mg) | Net Phosphate Balance, (mg) |
|-----------------|--------------------------------|------------------------|-------------------------|-----------------------------|-------------------------------------|--------------------------|-----------------------------|-----------------------------|
| 57/F/62         | 4                              | 9.4                    | 3.4                     | 625                         | 1950                                | 2575                     | 5401                        | -2826                       |
| 66/M/128        | 6                              | 4.6                    | 2.7                     | 1550                        | 1598                                | 3148                     | 9368                        | - 6220                      |
| 48/F/90         | 7                              | 7.9                    | 2.9                     | 775                         | 971                                 | 1747                     | 11301                       | - 9554                      |
| 70/M/77         | 2                              | 4.6                    | 3.3                     | 0                           | 558                                 | 558                      | 3922                        | - 3364                      |
| 61/F/125        | 7                              | 8.5                    | 2.6                     | 1240                        | 876                                 | 2116                     | 8217                        | - 6101                      |
| 71/F/60         | 2                              | 5.4                    | 2.2                     | 620                         | 468                                 | 1088                     | 2631                        | - 1543                      |
| 44/M/108        | 2                              | 7.7                    | 3                       | 620                         | 0                                   | 620                      | 3149                        | - 2529                      |
| 59/M/111        | 2                              | 4.2                    | 3.5                     | 0                           | 720                                 | 720                      | 2427                        | - 1707                      |
| 45/M/93         | 4                              | 7.3                    | 3.2                     | 310                         | 927                                 | 1237                     | 4091                        | - 2854                      |
| 65/F/112        | 2                              | 3.7                    | 2.5                     | 465                         | 0                                   | 465                      | 1447                        | - 982                       |
| 53/M/100        | 6                              | 6.1                    | 2.3                     | 1240                        | 1094                                | 2334                     | 5637                        | - 3303                      |
| 73/F/95         | 1                              | 7.2                    | 4.4                     | 0                           | 324                                 | 324                      | 842                         | - 518                       |
| 25/M/67         | 2                              | 5.1                    | 4.7                     | 0                           | 0                                   | 0                        | 3224                        | - 3224                      |
| 63/M/100        | 4                              | 10.4                   | 3                       | 0                           | 143                                 | 143                      | 8062                        | - 7919                      |
| 47/M/76         | 1                              | 4.8                    | 3.7                     | 0                           | 0                                   | 0                        | 2656                        | - 2656                      |
| 62/M/72         | 1                              | 2.6                    | 2                       | 465                         | 159                                 | 624                      | 1822                        | - 1198                      |
| 73/F/64         | 3                              | 3                      | 2.5                     | 310                         | 0                                   | 310                      | 2638                        | - 2328                      |
| 74/M/99         | 2                              | 6.1                    | 3.9                     | 310                         | 0                                   | 310                      | 2483                        | - 2173                      |
| 68/M/84         | 1                              | 5.8                    | 3.2                     | 0                           | 0                                   | 0                        | 1699                        | - 1699                      |
| 41/M/101        | 7                              | 6.2                    | 3.1                     | 310                         | 2355                                | 2665                     | 11101                       | - 8436                      |
| 71/M/92         | 7                              | 8.9                    | 3.1                     | 620                         | 0                                   | 620                      | 9933                        | - 9313                      |
| 51/F/86         | 1                              | 4.7                    | 2.6                     | 0                           | 561                                 | 561                      | 2142                        | - 1581                      |
| 64/M/100        | 2                              | 8                      | 5.1                     | 0                           | 0                                   | 0                        | 3843                        | - 3843                      |
| 62/M/72         | 2                              | 4.9                    | 2.6                     | 0                           | 0                                   | 0                        | 1704                        | - 1704                      |
| 78/M/95         | 1                              | 4.6                    | 2.9                     | 0                           | 518                                 | 518                      | 1588                        | - 1070                      |
| 64/F/112        | 3                              | 7.6                    | 3.4                     | 310                         | 0                                   | 310                      | 5184                        | - 4874                      |
| 60/M/70         | 7                              | 6.1                    | 2.9                     | 620                         | 480                                 | 1100                     | 9343                        | -8243                       |
| 80/M/91         | 2                              | 7.5                    | 3.2                     | 0                           | 0                                   | 0                        | 2574                        | -2574                       |
| 57/M/83         | 2                              | 4.8                    | 3.1                     | 0                           | 0                                   | 0                        | 3147                        | -3147                       |
| 72/M/105        | 2                              | 6.4                    | 3.4                     | 0                           | 0                                   | 0                        | 3591                        | -3591                       |
| 48/F/99         | 7                              | 8.2                    | 3.1                     | 0                           | 0                                   | 0                        | 13723                       | -13723                      |
| 52/M/136        | 1                              | 8.6                    | 6.8                     | 0                           | 0                                   | 0                        | 6490                        | -6490                       |
| 54/M/82         | 4                              | 6                      | 2.7                     | 310                         | 0                                   | 310                      | 6135                        | -5825                       |
| 50/M/116        | 2                              | 8                      | 4                       | 0                           | 389                                 | 389                      | 4758                        | - 4369                      |
| 66/M/80         | 4                              | 5.9                    | 2.9                     | 620                         | 2231                                | 2851                     | 6823                        | - 3972                      |

**Table S3.** Daily Phosphate Balances in patients on CVVH.

| Patient | Day 1   | Day 2 | Day 3 | Day 4 | Day 5 | Day 6 | Day 7 |
|---------|---------|-------|-------|-------|-------|-------|-------|
| 1       | -1576   | -622  | -373  | -256  |       |       |       |
| 2       | -2077   | -1539 | -544  | -769  | -520  | -772  |       |
| 3       | -2021   | -1980 | -1343 | -1404 | -575  | -963  | -1268 |
| 4       | -1595   | -1768 |       |       |       |       |       |
| 5       | -1863   | -1319 | -870  | -449  | -573  | -576  | -449  |
| 6       | -826.7  | -716  |       |       |       |       |       |
| 7       | -1120.8 | -1408 |       |       |       |       |       |
| 8       | -816    | -891  |       |       |       |       |       |
| 9       | -308    | -974  | -518  | -1065 |       |       |       |
| 10      | -350    | -632  |       |       |       |       |       |
| 11      | -665    | -573  | -276  | -473  | -696  | -305  |       |
| 12      | -517    |       |       |       |       |       |       |
| 13      | -1269   | -1955 |       |       |       |       |       |
| 14      | -2879   | -1961 | -1876 | -1204 |       |       |       |
| 15      | -2656   |       |       |       |       |       |       |
| 16      | -1198   |       |       |       |       |       |       |
| 17      | -1085   | -814  | -429  |       |       |       |       |
| 18      | -1613   | -559  |       |       |       |       |       |
| 19      | -1699   |       |       |       |       |       |       |
| 20      | -2221   | -2381 | -1569 | -665  | -393  | -451  | -749  |
| 21      | -2250   | -1797 | -1511 | -1460 | -961  | -626  | -697  |
| 22      | -1579   |       |       |       |       |       |       |
| 23      | -2262   | -1578 |       |       |       |       |       |
| 24      | -1034   | -668  |       |       |       |       |       |
| 25      | -1070   |       |       |       |       |       |       |
| 26      | -1982   | -1824 | -1069 |       |       |       |       |
| 27      | -1108   | -906  | -1517 | -1312 | -1313 | -823  | -1259 |
| 28      | -1531   | -1159 |       |       |       |       |       |
| 29      | -1552   | -1592 |       |       |       |       |       |
| 30      | -1642   | -1949 |       |       |       |       |       |
| 31      | -2727   | -2718 | -2043 | -1535 | -1949 | -1669 | -1082 |
| 32      | -6490   |       |       |       |       |       |       |
| 33      | -1934   | -2019 | -1076 | -796  |       |       |       |
| 34      | -2435   | -1933 |       |       |       |       |       |
| 35      | -1407   | -784  | -735  | -1046 |       |       |       |

(All balances are in negative)
